# Supplementary figures and images for: Improving medication safety in a paediatric hospital: a mixed-methods evaluation of a newly implemented computerised provider order entry system
Source: HighWire-hosted journal article supplement (doi:10.1136/bmjhci-2022-100622), 2023-02-01

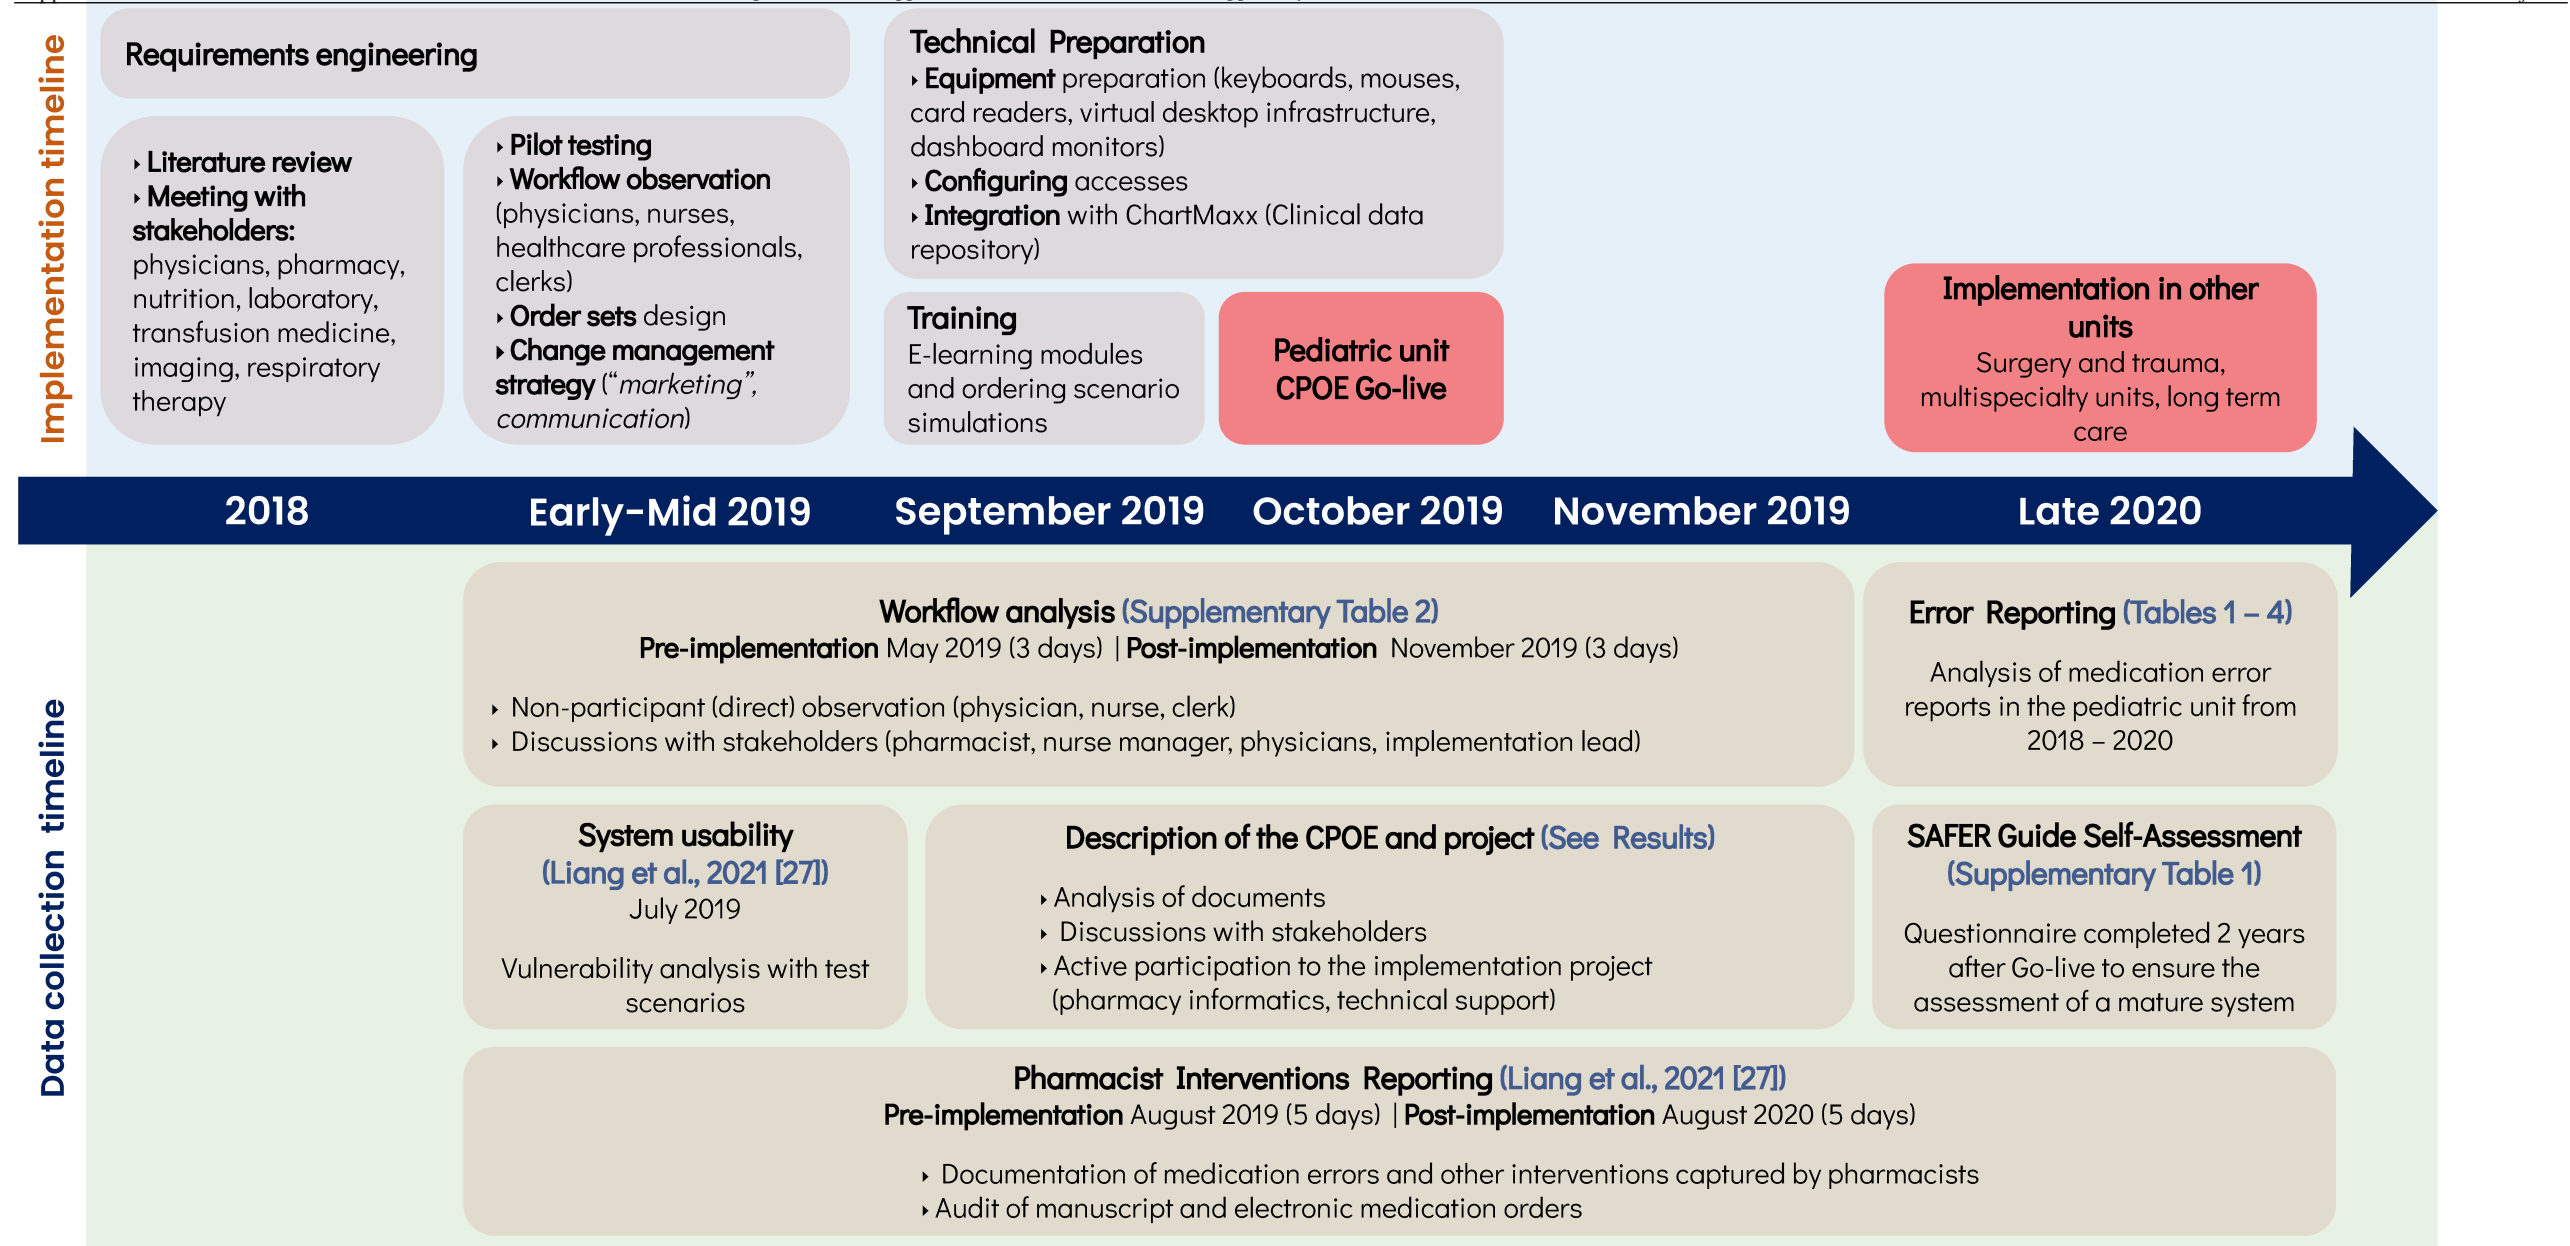

Supplement: bmjhci-2022-100622supp001_data_supplement.pdf [file bmjhci-2022-100622supp001_data_supplement.pdf]
